1 **Differences in DNA methylation of white blood cell types at birth and in adulthood**  
2 **reflect postnatal immune maturation and influence accuracy of cell type**  
3 **prediction**

4  
5 Meaghan J Jones<sup>1,2</sup>, Louie Dinh<sup>1,2</sup>, Hamid Reza Razzaghian<sup>2,3</sup>, Olivia de Goede<sup>4</sup>, Julia  
6 L Maclsaac<sup>1,2</sup>, Alexander M. Morin<sup>1,2</sup>, Kristina Gervin<sup>5</sup>, Raymond Ng<sup>6</sup>, Liesbeth Duijts<sup>7</sup>,  
7 Menno C van Zelm<sup>8,9</sup>, Henriëtte A Moll<sup>10</sup>, Robert Lyle<sup>5</sup>, Wendy P Robinson<sup>1,2</sup>, Devin C  
8 Koestler<sup>11</sup>, Janine F Felix<sup>12</sup>, Pascal M Lavoie<sup>2,3</sup>, Sara Mostafavi<sup>1,2,13</sup>, Michael S  
9 Kobor<sup>1,2,13</sup>

10  
11 **Affiliations:**

- 12 1. Department of Medical Genetics, University of British Columbia, Vancouver,  
13 Canada
- 14 2. BC Children's Hospital Research Institute, Vancouver, Canada
- 15 3. Department of Pediatrics, University of British Columbia, Vancouver, Canada
- 16 4. Department of Genetics, Stanford University, Stanford, CA, USA
- 17 5. Department of Medical Genetics, Oslo University Hospital, Oslo, Norway
- 18 6. Department of Computer Science, University of British Columbia, Vancouver,  
19 Canada
- 20 7. Department of Pediatrics, Divisions of Respiratory Diseases and Allergology, and  
21 Neonatology, Erasmus MC, University Medical Center Rotterdam, the  
22 Netherlands
- 23 8. Department of Immunology and Pathology, Central Clinical School, Monash  
24 University and The Alfred Hospital, Melbourne, Australia
- 25 9. Department of Immunology, Erasmus MC, University Medical Center Rotterdam,  
26 Rotterdam, the Netherlands
- 27 10. Department of Pediatrics, Erasmus MC-Sophia's Children's Hospital, University  
28 Medical Center Rotterdam, Rotterdam, the Netherlands
- 29 11. Department of Biostatistics, University of Kansas Medical Center, Kansas City,  
30 KS, USA
- 31 12. Generation R Study Group, Department of Pediatrics, and Department of  
32 Epidemiology Erasmus MC, University Medical Center Rotterdam, Rotterdam,  
33 the Netherlands
- 34 13. Canadian Institute for Advanced Research, Toronto ON, Canada

35  
36 **Abstract**

37 Background: DNA methylation profiling of peripheral blood leukocytes has many  
38 research applications, and characterizing the changes in DNA methylation of specific  
39 white blood cell types between newborn and adult could add insight into the maturation  
40 of the immune system. As a consequence of developmental changes, DNA methylation  
41 profiles derived from adult white blood cells are poor references for prediction of cord  
42 blood cell types from DNA methylation data. We thus examined cell-type specific  
43 differences in DNA methylation in leukocyte subsets between cord and adult blood, and  
44 assessed the impact of these differences on prediction of cell types in cord blood.

45 Results: Though all cell types showed differences between cord and adult blood, some  
46 specific patterns stood out that reflected how the immune system changes after birth. In  
47 cord blood, lymphoid cells showed less variability than in adult, potentially  
48 demonstrating their naïve status. In fact, cord CD4 and CD8 T cells were so similar that  
49 genetic effects on DNA methylation were greater than cell type effects in our analysis,  
50 and CD8 T cell frequencies remained difficult to predict, even after optimizing the library  
51 used for cord blood composition estimation. Myeloid cells showed fewer changes  
52 between cord and adult and also less variability, with monocytes showing the fewest  
53 sites of DNA methylation change between cord and adult. Finally, including nucleated  
54 red blood cells in the reference library was necessary for accurate cell type predictions  
55 in cord blood.

56 Conclusion: Changes in DNA methylation with age were highly cell type specific, and  
57 those differences paralleled what is known about the maturation of the postnatal  
58 immune system.

59

60 **Keywords:** DNA methylation, immune system, development, cord blood, white blood  
61 cells, 450k

62

## 63 **Background**

64 One of the main established roles for DNA methylation (DNAm) is in development,  
65 where it contributes to the functional maturation, lineage commitment and fate of cells.<sup>1</sup>

66 This has two important implications; the first is that DNAm within a given cell type will  
67 change over time as cells differentiate and function develops.<sup>2</sup> The second is that  
68 different types of terminally differentiated cells will have very distinct DNAm profiles.<sup>3,4</sup>

69 As the age of individuals and cell type are two of the major determinants of DNAm  
70 variability, analyses of DNAm data must carefully consider those variables.<sup>5,6</sup> Due to an  
71 important role of DNAm in development, close assessment of developmental  
72 processes, by identifying specific genes or genomic regions that change with age.

73 This is of particular interest in blood, where development of the immune system in early  
74 life is linked to long term health outcomes, and so the analysis of the changes in DNAm  
75 from birth to adulthood may provide insights into how the immune system matures.

76 Umbilical cord blood is an important and much utilized research tissue, as it is easy to  
77 collect from the umbilical cord post-delivery, and thus many studies have assessed  
78 DNAm in relatively large numbers of cord blood samples.<sup>7,8</sup> Cord blood is very distinct  
79 from adult blood, as it contains a much greater abundance of nucleated red blood cells  
80 (nRBC) expressing unique proteins such as fetal hemoglobin, as well as functionally

81 distinct myeloid and lymphoid cells<sup>9,10</sup> These distinct functions reflect the greater  
82 reliance on innate immunity in newborns, as adaptive immune cells requires exposure  
83 to pathogens in order to mature and generate functional memory<sup>11,12</sup> Thus, one might  
84 expect that innate immune cells such as granulocytes, monocytes, and NK cells, would  
85 be more similar over development than adaptive immune cells like B and T cells.  
86 However, this relationship is more complex, with differences observed even in the  
87 function of innate immunity between newborns and adults, indicating that the  
88 functionality of specific innate cell types also changes over development<sup>13,12,14</sup>.

89 These biologically meaningful differences in function are likely to be reflected in DNAm  
90 changes over developmental time, and thus can cause complications for the analysis of  
91 DNAm data, as computational tools designed for use in adult blood may not function as  
92 well for blood from children or newborns. An example of this is cell-type deconvolution,  
93 which is one of the major tools used to account for inter-individual differences in cell  
94 type composition in mixed tissue samples, such as blood, when more direct measures  
95 are not available.<sup>15-19</sup> Failing to account for these inter-individual differences in cell type  
96 composition can lead to both false positive and false negative results in epigenetic  
97 association studies, and therefore accurate implementation of this tool in a  
98 developmental context is essential.<sup>2,5</sup> Perhaps not surprisingly, as the most commonly  
99 used tool was designed for adult references, it performs poorly on cord blood data.<sup>20-24</sup>

100 In an attempt to address this problem, three different reference datasets for cord blood  
101 to create developmental stage specific libraries have been published, but validation  
102 studies using these updated references only partially close the gap between adult and  
103 cord blood prediction accuracy.<sup>20,22,25</sup>

104 In this study, we compared DNAm profiles of purified leukocyte subsets from cord and  
105 adult blood, with the goal of further understanding the biological differences in each cell  
106 type as they mature. Using these insights, we then tested specific assumptions of  
107 existing deconvolution methods for estimating cell type proportions in cord blood,  
108 modified the algorithm to account for the differences between cord and adult, and  
109 evaluated the prediction accuracy on two data sets. We showed that differences  
110 between cord and adult blood cell types reflected the functional maturation of the

111 immune system, and these differences must be incorporated into the design of methods  
112 to be used on DNAm data.

113

## 114 **Results**

### 115 *Cell type-specific DNA methylation in adult and cord blood*

116 Previous reports have shown that adult references poorly predict cell types in cord  
117 blood.<sup>20-22</sup> We hypothesized that differences in DNAm between cord and adult blood  
118 might impact the performance of cell type deconvolution, and so compared patterns of  
119 DNAm in the adult and cord blood reference data sets.<sup>3,20,25</sup> In order to take advantage  
120 of as many samples as possible, we combined two previously published cord blood data  
121 sets, and compared them to a publicly available adult blood data set (Table 1).<sup>3,20,25</sup> All  
122 three data sets were generated from Fluorescence Activated Cell Sorting (FACS)-  
123 isolated white blood cell types from healthy donors, resulting in 6 sets of adult blood and  
124 18 sets of matched 450k cord blood DNAm profiles. All three sets were combined and  
125 processed together, and after processing and filtering, 428,688 probes remained.  
126 Visualization by hierarchical clustering of all CpGs analyzed showed that samples  
127 grouped first by myeloid (granulocytes, monocytes) versus lymphoid (B, T, NK cells)  
128 lineage, then by age, and finally by specific cell type (Figure 1A). Adult lymphocytes  
129 were the most distinct group, followed by nRBCs. In cord blood samples, CD4 and CD8  
130 T cells clustered in one large group, paired by individual as opposed to cell type. This  
131 indicated that the influence of genotypic variation within our study population  
132 outweighed the influence of cell type on DNAm patterns of CD4 and CD8 T cells in cord  
133 blood. To further test this, we performed a silhouette analysis, with cell types as  
134 clusters. Consistent with expectations, all cell types clustered relatively well, with the  
135 exception of CD8 T cells, where cord CD8 T cells did not cluster well with adult CD8 T  
136 cells (Figure S1).

137

138 **Table 1:** Summary of data sets used in this study

|                 | <b>Reinius</b> | <b>Gervin</b> | <b>de Goede</b> |
|-----------------|----------------|---------------|-----------------|
| <b>Age</b>      | Adult          | Cord          | Cord            |
| <b>% female</b> | 0              | 54.5          | 71.4            |

N

|             |    |    |   |
|-------------|----|----|---|
| CD8T        | 6  | 11 | 6 |
| CD4T        | 6  | 11 | 7 |
| B           | 6  | 11 | 7 |
| NK          | 6  | 11 | 7 |
| Granulocyte | 18 | 11 | 7 |
| Monocyte    | 6  | 11 | 7 |
| nRBC        | 0  | 0  | 7 |

139

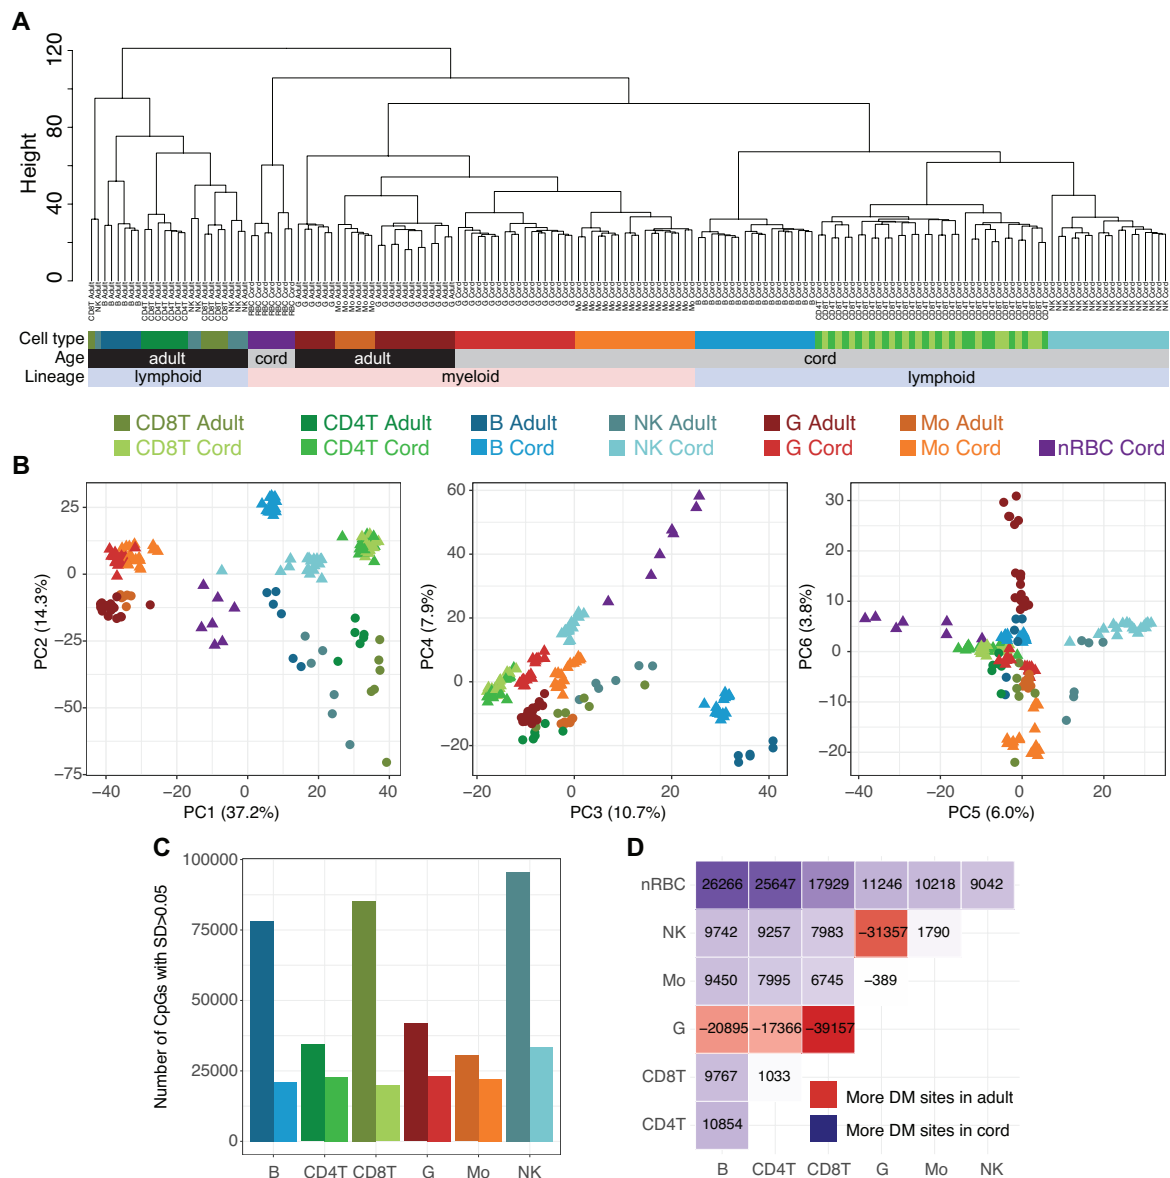

140

141

142

**Figure 1: DNA methylation patterns of cord blood cell types were highly distinct from the corresponding cell types in adult blood. A) Dendrogram of 162 samples,**

143 n=5 for each adult cell type, n=18 for cord B cells, CD4 T cells, granulocytes,  
144 monocytes, and NK cells, n=17 for CD8 T cells, and n=7 for nRBCs. Samples clustered  
145 first by lineage (pink = myeloid, pale blue= lymphoid), then by age (black = adult, grey =  
146 cord), and then by specific cell type (colour scale below). **B)** The first six principal  
147 components of the data set in A, where circles are adult samples and triangles are cord  
148 blood samples, colours as above, and percent of variance indicated on the relevant  
149 axis. **C)** Number of sites in each cell type with an SD>0.05 in adult and cord cell types.  
150 See full counts of variable sites for all cell types and cell mixtures in Table S1. **D)**  
151 Heatmap showing number of sites that distinguish between each pair of cell types in  
152 adult versus cord data (adult nRBC values were set to zero). The red colour indicates  
153 that more sites distinguish these cell types in adult and purple indicates that more sites  
154 distinguish these cell types in cord.

155

156 Next, we used Principal Component Analysis (PCA) to determine how the patterns of  
157 variability in DNAm differed between cord and adult blood cell types. We first examined  
158 the first six principal components (PCs), accounting for more than 80% of the variance  
159 and which separate the different cell types. The first PC, accounting for 37% of the  
160 variance, separated the myeloid and lymphoid lineages (t-test  $p < 1 \times 10^{-16}$ ), with distinct  
161 clustering of cord and adult samples in the second PC (t-test  $p < 1 \times 10^{-16}$ ), accounting for  
162 14% of the variance (Figure 1B). Myeloid cell types clustered more closely than  
163 lymphoid cell types across PCs, perhaps reflecting a relative functional and lineage  
164 proximity. These findings were consistent with the results of our hierarchical clustering  
165 analysis. Next, we visually examined the spread of PC scores within a cell type, an  
166 indication of how similar the samples within a cell type are to one another. Across both  
167 of the top PCs, adult lymphoid cell types showed greater variability compared to myeloid  
168 cell types (Figure 1B). The variability within adult lymphoid cells was also higher than  
169 their corresponding cord blood cell types in these first PCs, which may reflect an  
170 increasing proportion of differentiated effector and memory T and B cells due to antigen  
171 exposure over lifespan.

172 To quantify the observed differences in variability between cord and adult blood  
173 observed by PCA, we examined the number of variable sites within each cell type. We  
174 hypothesized that a high number of variable sites in any particular cell type might make  
175 it more difficult to identify tissue-specific sites, as variable sites within a cell type are  
176 unlikely to be good cell type markers. Due to different sample numbers, we compared  
177 the adult samples only to one sorted cord blood data set (de Goede), which have similar

178 sample sizes (n=6 adult, n=7 cord), but includes nRBCs. We defined a variable probe  
179 as having a beta value standard deviation greater than 0.05 (Table S1). Notably, nRBCs  
180 exhibited a large number of variable probes (77,888). All cell types showed more  
181 variable sites in adult than in cord, and B cells, CD8 T cells, and NK cells showed  
182 considerably more than CD4 T cells, monocytes and granulocytes. While overall, the  
183 total numbers of variable sites were likely not high enough to influence the accuracy of  
184 cell type prediction, higher variability in adult lymphoid cell types might be reflective of  
185 inter-individual differences in adaptive immunity (Figure 1C, raw counts in Table S1).

186 We next determined whether cell type pairs were more or less difficult to distinguish  
187 from one another in cord blood as compared to adult blood. To do this, we extracted the  
188 number of differentially methylated probes within cord or adult whole blood using  
189 pairwise comparisons for all cell types with a stringent nominal p value of  $1 \times 10^{-7}$ . As  
190 expected, we found different candidate cell type DNAm markers between the two ages,  
191 but also noted important differences in the numbers of CpGs that can distinguish  
192 between cord and adult blood cell types (Figure 1D). All pairs, except those involving  
193 granulocytes, had more sites distinguishing pairs in cord than in adult samples. This  
194 may be because cord samples were less variable than adult within a cell type as  
195 observed in both PCA and the number of variable sites, making it easier to distinguish  
196 one cell type from another.

197 To identify cell type specific DNAm differences between cord and adult blood, we  
198 performed an epigenome-wide association study (EWAS) between cord and adult in the  
199 six common cell types (CD4 T, CD8 T, NK, B, granulocyte and monocyte) and the two  
200 cell mixtures (whole blood and mononuclear cells). As expected, a large number of  
201 CpGs were differentially methylated between cord and adult blood at a p value of  $1 \times 10^{-7}$   
202 and a mean DNAm difference of 10% (min 2989 for monocytes, max 9885 for  
203 granulocytes, Figure 2A, Figure S2, Table S2). In the purified cell types, 588 CpGs were  
204 differentially methylated between cord and adult samples in all six types, and 397 and  
205 2062 CpGs were lymphoid or myeloid specific, respectively (Figure 2A, full overlap in  
206 Table S3).

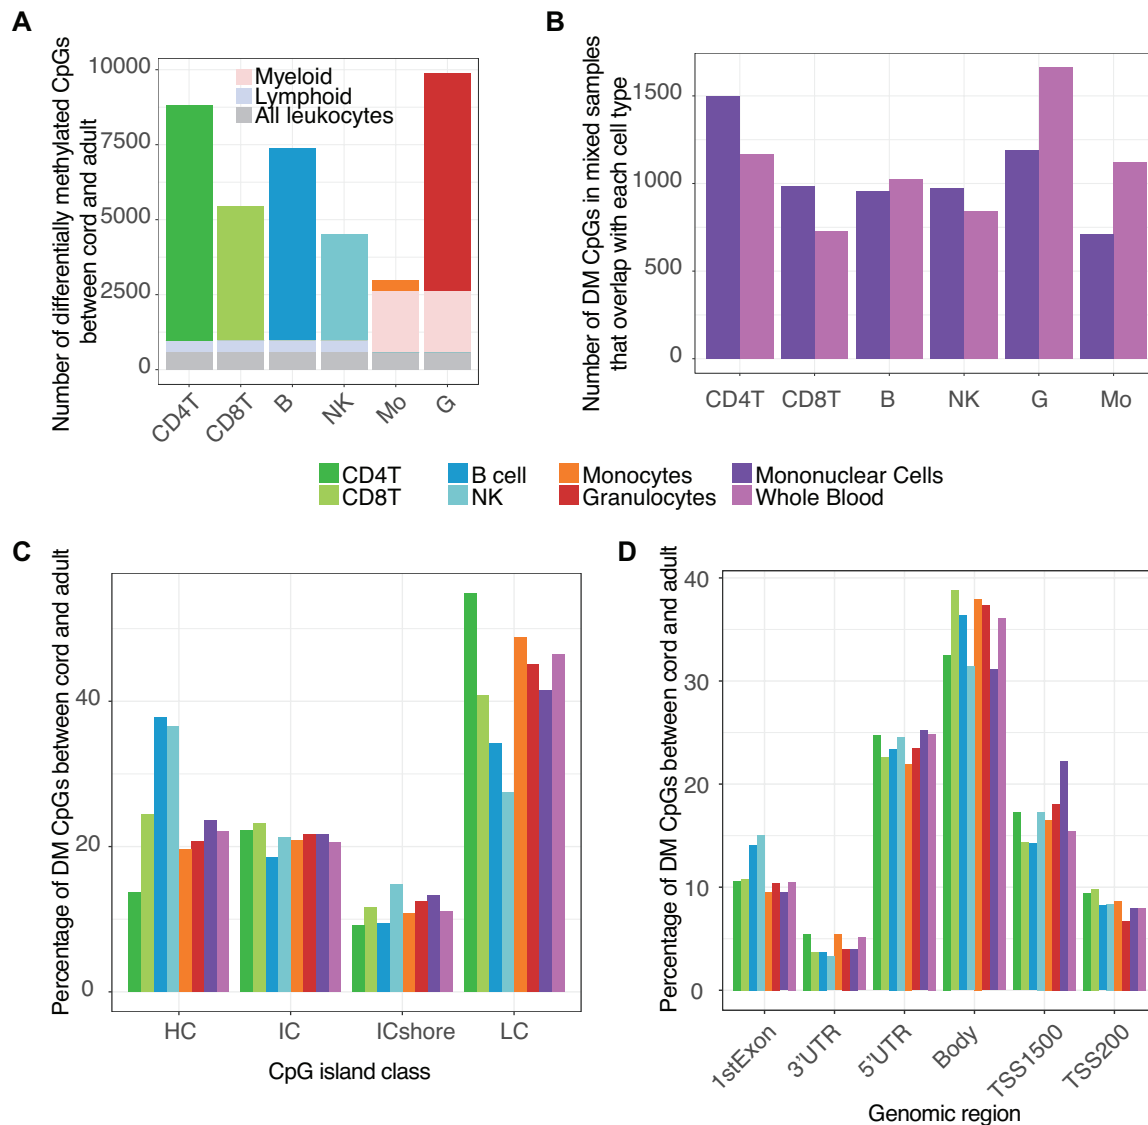

207

208

209 **Figure 2. DNA methylation differences between cord and adult blood cells by cell**

210 **type and genomic location.** We performed an EWAS comparing cord to adult samples

211 for each cell type, retaining sites with a p value  $<1 \times 10^{-7}$  and a mean DNA methylation

212 difference  $>10\%$  (visualized in Figure S2). **A**) The number of significantly differentially

213 methylated CpGs between cord and adult blood in the six cell types. Significant CpGs in

214 all cell types are in grey (N=588), lymphoid specific (N=397) or myeloid specific

215 (N=2062) CpGs are in pale blue or pink, respectively, and the remaining CpGs are in

216 the colour of that cell type. Note that these might not all be unique to that cell type, but

217 are neither common, nor specific to lymphoid or myeloid cells. Total pairwise overlap

218 numbers are in Table S2. **B**) Number of CpGs in mixed tissues which were differentially

219 methylated (N=2558 and N=1993 in whole blood and mononuclear cells, respectively),

220 and overlap with the differentially methylated sites in each cell type. The number of sites

221 common across all cell types and cell mixtures (N=507 out of 588 in grey in part A) was

222 subtracted from the total number. **C**) Proportion of differentially methylated CpGs in

223 each cell type and cell mixture that fall within each of the four CpG island classes (HC =

high density, IC = intermediate density, ICshore = CpG island shore LC=low density). **D**)



224 Proportion of differentially methylated CpGs in each cell type and cell mixture that fall  
225 within five common genomic features. Sites not annotated to a specific region are not  
226 shown.

227

228 In an effort to determine how much of these differences were due to genetic effects,  
229 given that our cord and adult samples were not from the same individuals, we examined  
230 the overlap with CpGs previously identified as being associated with genotype (mQTLs)  
231 in cord blood in the ARIES data set (Table S3).<sup>8</sup> We hypothesized that genetic effects  
232 would be observed at highest proportion in those sites which were differentially  
233 methylated between cord and adult samples in all cell types, as cross-tissue genetic  
234 effects seem to be more frequent than tissue-specific genetic effects.<sup>26,27</sup> The results  
235 from these analyses revealed that between 9 and 11% of the myeloid- and lymphoid-  
236 specific differentially methylated sites were currently reported mQTLs. In the individual  
237 lymphoid cell types, 6-12% of the differentially methylated CpGs between cord and adult  
238 blood were cord blood mQTLs. Interestingly, the myeloid cell types showed a very  
239 different pattern, where 18% of the differentially methylated CpGs in granulocytes and  
240 79% in monocytes were cord blood mQTLs. This result was surprising, as it implies that  
241 many of the differentially methylated CpGs between cord and adult blood in monocytes  
242 might be mQTLs, despite the fact that it already had the smallest number of differentially  
243 methylated sites among cell types. This could have interesting implications for future  
244 assessment of genetic influences on cell type specific DNAm.

245 Next, we examined the differentially methylated sites between cord and adult in two  
246 commonly used cell mixtures; whole blood, which contains all cell types and  
247 granulocytes are by far the most prevalent and blood enriched for mononuclear cells,  
248 which primarily removes granulocytes, leaving CD4T cells as the most prevalent cell  
249 type. We hypothesized that the differences between cord and adult in these mixtures  
250 would be influenced by the underlying cell proportions, meaning that differentially  
251 methylated CpGs in each mixture would overlap most with the most prevalent cell type  
252 in that mixture. This was indeed observed, with differentially methylated sites in  
253 mononuclear cells overlapping most with those sites which were differentially  
254 methylated in CD4 T cells and, and likewise whole blood sites overlapped most with  
255 granulocyte sites (Figure 2B).

256 Finally, we examined the genomic feature locations of the differentially methylated sites  
257 between cord and adult in all cell types by mapping each CpG to CpG island class (HC:  
258 high density CpG island, LC: low density CpG island, IC: intermediate density CpG  
259 island) and genomic features. In NK and B cells, more CpGs mapped to high density  
260 (HC) islands and less for low density (LC) islands. CD4 T cells showed the opposite  
261 pattern. Overall the cell types were quite consistent in enrichment for CpG island status  
262 (Figure 2C). Few differences between the cell types and mixtures were observed for  
263 enrichment of the six genomic regions (1<sup>st</sup> exon, 3'UTR, 5'UTR, gene body, TSS200,  
264 and TSS1500) investigated (Figure 2D).

265

266 *Probe type selection method and inclusion of nRBCs influenced cell type prediction*  
267 *accuracy in cord blood*

268 Given that DNAm showed substantial differences between cord and adult blood in both  
269 variability and at specific sites across the genome, we next identified which parts of the  
270 deconvolution algorithm might be affecting the accuracy of predictions in cord blood. To  
271 do this, we used a validation data set of 24 whole cord blood samples from which both  
272 DNAm measurements and matched cell counts determined by flow cytometry were  
273 available. First, we applied the existing deconvolution algorithm from the minfi package  
274 using default settings to the test data using the adult references, and repeated the same  
275 prediction using the cord references that included nRBCs. The results from these  
276 analyses revealed moderate prediction of cord blood cell types using adult references,  
277 and slightly improved predictions using the de Goede cord blood references, in  
278 agreement with previous studies (Figure S3).<sup>20-22</sup>

279 We then hypothesized that the method for selecting sites to use in deconvolution could  
280 influence its prediction accuracy, as the observed differences between cord and adult  
281 DNAm mean that the method created for adult blood may be less effective on cord  
282 blood. Several selection heuristics have been proposed and modified over the past few  
283 years.<sup>28,29</sup> The original method selected the top 50 probes that display higher and lower  
284 DNAm in each cell type according to their effect size, for a total of 100 probes per cell  
285 type. In cord blood, we replicated a previous finding that for monocytes in particular, this

286 selection method chooses many sites that do not distinguish between monocytes and  
287 other cell types, as there are less than 20 monocyte markers that have higher DNAm in  
288 monocytes than other cell types (Figure S4).<sup>22</sup> This means that in cord blood, forcing  
289 probe selection to include an equal number of higher and lower methylated probes  
290 would adversely affect monocyte prediction at the very least, which would in turn reduce  
291 the accuracy of prediction for the other cell types.

292 Next we examined the predictions of nRBCs, which can account for up to 25% of the  
293 nucleated cell composition in cord blood, and possibly more of the DNAm signal due to  
294 cell free DNA from nRBCs that had already extruded their nuclei.<sup>25</sup> As previously  
295 reported, nRBCs have a unique DNAm profile in cord blood, quite different from the  
296 typical bimodal distribution of DNAm patterns in other cell types (Figure S5A).<sup>25</sup> In  
297 addition, not including nRBCs in the reference library, as occurs when using the Gervin  
298 reference data set, violates one of the assumptions of the deconvolution method, which  
299 is that all major cell types are represented in the reference set.<sup>18</sup> Thus, we assessed the  
300 impact of removing nRBCs from our reference set. For each sample in the validation  
301 data set, we predicted cell type proportions with and without the nRBCs included. We  
302 then calculated percentage change in estimated proportion for each sample and found  
303 an uneven impact across cell types, with B cells (20% mean, 50% maximum), monocyte  
304 (10% mean, 52% maximum) and NK (21% mean, 62% maximum) cells having the  
305 largest percentage difference in predicted cell type caused by the removal of nRBCs  
306 from the reference set (Figure S5A). The magnitude of impact was related to both the  
307 abundance of cell type and similarity of DNAm profiles between cord blood cell types as  
308 shown by hierarchical clustering across discriminating probes used in the deconvolution  
309 (Figure S5B). This demonstrated how inclusion of nRBCs, which displayed distinct  
310 DNAm patterns in cord blood, was crucial for accurate deconvolution.

311

312 *Using cord references, modified probe selection, and including nRBCs resulted in*  
313 *improved age-specific cell type prediction accuracies in whole blood data sets*

314 Our results have shown that the difference in performance between adult and cord  
315 blood were likely not due to any single main factor, but rather the compounding of

316 multiple effects based on the unique properties of cord blood. By resolving the issues  
317 identified above, we produced cord blood prediction performance that were more  
318 comparable to previously reported adult whole blood deconvolution in our validation  
319 data (B cell  $\rho=0.73$ , CD4T  $\rho=0.84$ , CD8T  $\rho=0.40$ , gran  $\rho=0.64$ , mono  $\rho=0.53$ ,  
320 NK  $\rho=0.67$ , nRBC  $\rho=0.66$ , Figure 3A).<sup>19</sup> All cell types showed good correlations,  
321 though nRBCs and CD8 T cells seemed to be over-estimated across all samples. PCA  
322 analysis shows that most of our predicted cell type proportions were significantly  
323 associated with PC1 of cord blood DNAm, as expected (Figure 3B). Interestingly, the  
324 signal for nRBCs, specific to cord blood, was only associated with PC2 and PC4,  
325 signifying that the nRBC contribution to DNAm pattern in cord blood accounts for less  
326 variance than the other cell types.

**A. Cord references, cord samples, optimized method**

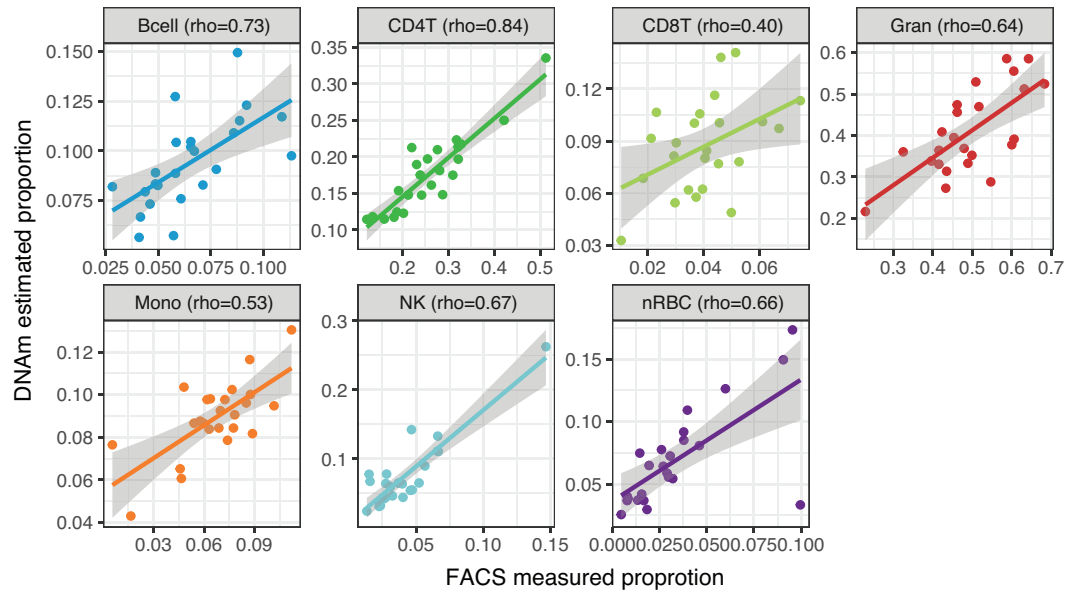

**B.**

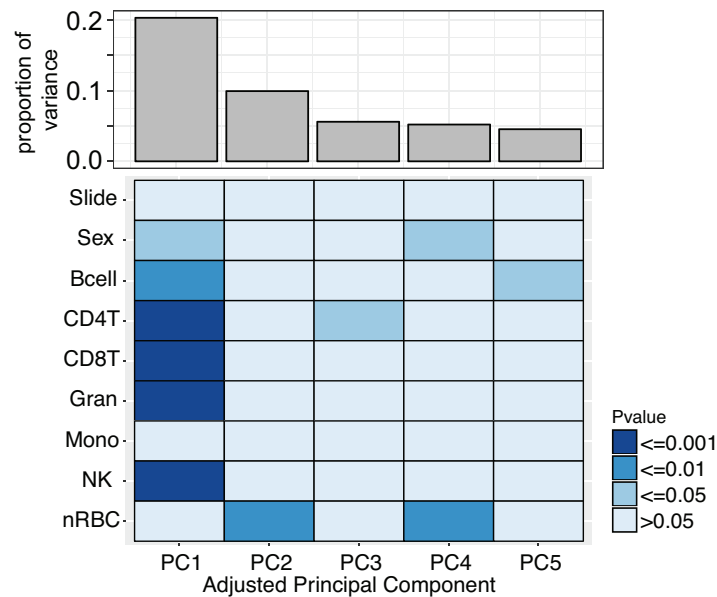

327

328

329

330

331

332

333

334

335

336

337

**Figure 3: Including nRBCs, altering the probe selection, and using cord references improved deconvolution accuracy in cord blood.** A) flow cytometry-based cell counts (x axis) compared with DNAm predicted (y axis) enumeration for each of the seven cord blood cell types. Spearman's rho for each is shown. Coloured lines indicate regression line for each cell type, and shaded areas 95% confidence interval. B) PCA on 24 whole cord bloods shows associations between deconvolution-based cell counts and PC1, as expected.

To validate the modifications to the cord blood cell type prediction method, we applied our method to an external data set of 191 cord blood samples with flow cytometry-

338 based cell type enumerations from the Generation R cohort study.<sup>10,20,30</sup> Unfortunately,  
339 this validation data set has not measured nRBCs, and so although we predicted nRBCs,  
340 we were unable to validate predictions of this important cell type. However, the  
341 prediction accuracy of the other cell types were generally higher than previously shown  
342 (Figure 4).<sup>20</sup> This indicates that the combination of using cord references and including  
343 nRBCs combined with correct probe type selection for cord blood result in accurate  
344 predictions across data generating platforms.

345

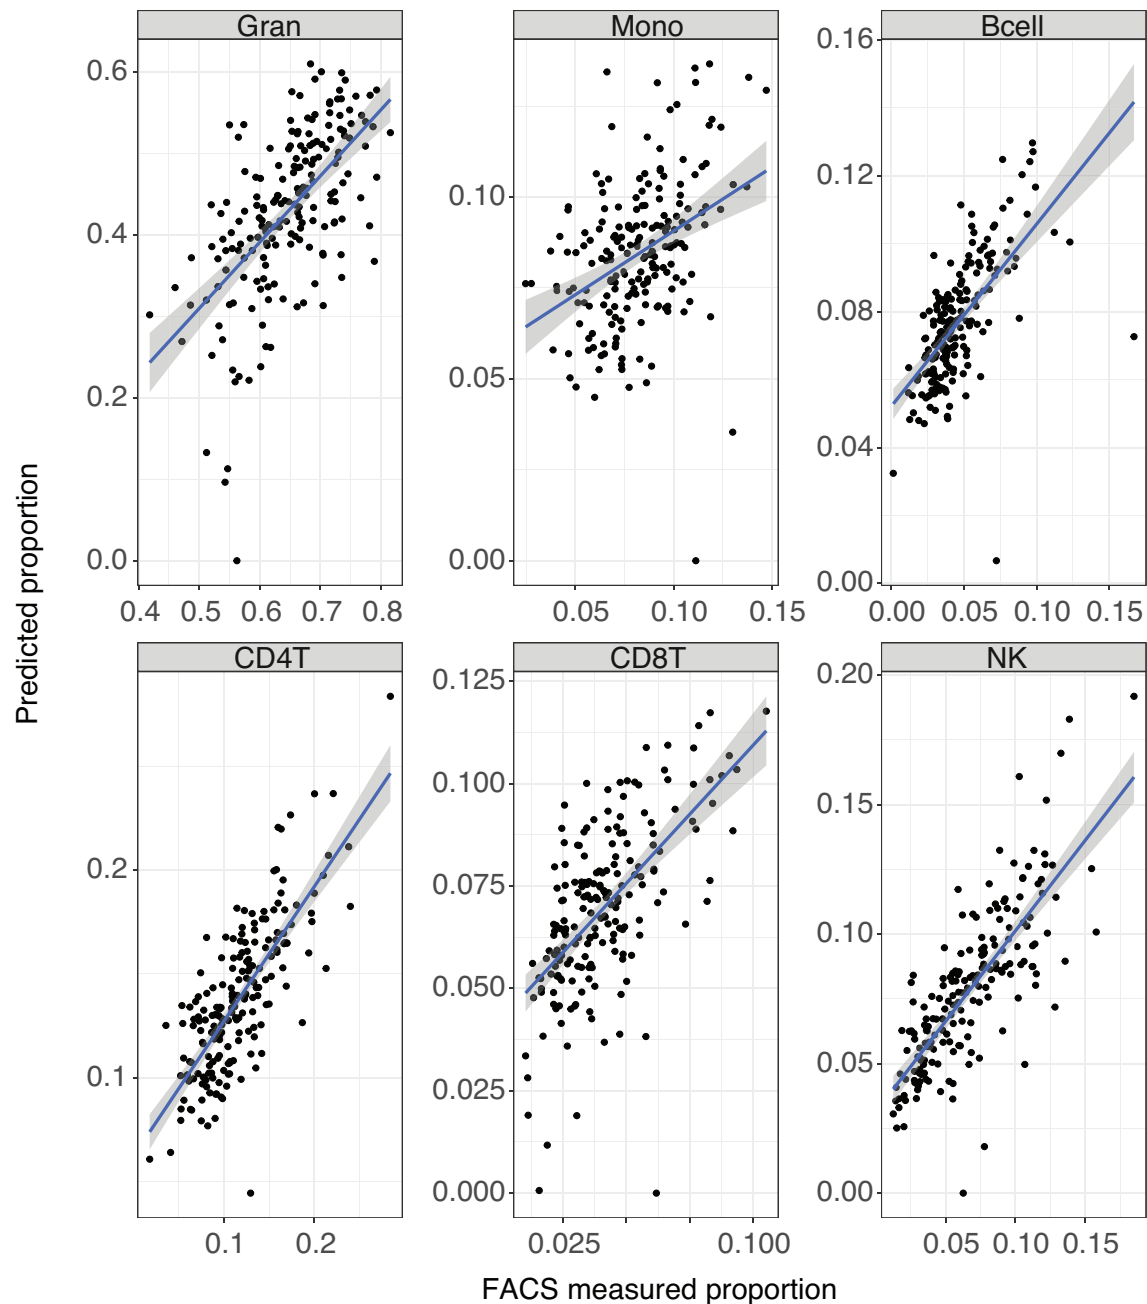

346

347 **Figure 4: Improved deconvolution resulted in improved prediction accuracy in an**  
348 **independent validation cohort of 191 cord blood samples.** Blue line indicates linear  
349 regression line, and grey shading indicates 95% confidence interval. nRBCs were  
350 predicted using deconvolution but not measured using FACS and so are not shown.

351

## 352 Discussion

353 Here, we have explored intrinsic biological differences in DNAm between cord and adult  
354 blood cell types. In addition to providing important insights into the fundamental

355 developmental trajectories of DNAm, these analyses led to important adaptations to  
356 deconvolution methods that are necessary for accurate predictions of cell type  
357 composition in whole cord blood samples. It has been previously shown that DNAm is  
358 highly variable with age, but age-related effects on individual cell types have not been  
359 as well studied.<sup>2,24</sup>

360 At least two clear differences exist between cord and adult white blood cells that could  
361 influence DNAm, and which might differ across cell types. The first is the impact of age  
362 and immunological maturation of white blood cell types after birth.<sup>2,31,32</sup> While not yet  
363 documented, it was perhaps not surprising that DNAm patterns from cord and adult cell  
364 types were visually distinct in both clustering and PCA analysis. However, the number  
365 of variable sites within cell types was highly different between cord and adult samples.  
366 Though all cell types had distinct PCA patterns between cord and adult, this was  
367 accentuated in lymphoid than myeloid cells. This observation likely reflected a  
368 predominant functional maturation of lymphoid cells post-natally, in contrast to myeloid  
369 cells whose function matures predominantly earlier during fetal development.<sup>10,31,32</sup>  
370 Further, CD4 and CD8 T cells clustered very differently in cord blood than in adult  
371 blood. In adults, CD4 and CD8 T cells clustered separately, whereas in cord blood they  
372 clustered by individual rather than by cell type. These results suggested that neonatal  
373 CD4 and CD8 T cells were more similar at the DNAm level, which may reflect a relative  
374 lack of functional differentiation between these two cell lineages prior to antigen  
375 exposure. This may also explain why CD8 T cells proportions were difficult to predict  
376 accurately in cord blood here, as was also observed in a previous study.<sup>20</sup> It is possible  
377 to predict CD4 T cells more accurately due higher abundance, compared to CD8 T  
378 cells, which are both hard to discriminate and of lesser abundance in cord blood.<sup>33</sup>  
379 Thus, a possible solution could be to combine these two cell types for prediction of cell  
380 composition in cord blood samples.

381 Both variability and EWAS results demonstrated that DNAm differences between cord  
382 and adult blood were distinct between cell types. Adult cell types were more variable  
383 than cord, with B, CD8 T, and NK cells showing the largest differences. EWAS within  
384 cell types identified thousands of DNAm differences between cord and adult, but the  
385 specific number of differentially methylated CpGs varied across cell types, with



386 granulocytes showing the most differentially methylated sites and monocytes the least.  
387 This finding is unusual, given that in the PCA analysis, both granulocytes and  
388 monocytes showed more similar broad DNAm patterns between cord and adult than  
389 any of the lymphoid cell types. Additionally, there were many more sites that differed  
390 between cord and adult and were common between the two myeloid cell types than  
391 between the lymphoid cells. This could be a further indication that at least at the level of  
392 DNAm, myeloid cell types were more similar to one another than the lymphoid cell  
393 types, but it was also possible that the overlap appeared higher because there are only  
394 two myeloid cell types, rather than the four lymphoid, and so the overlap may be higher  
395 by chance.

396 Interestingly, in lymphoid cells approximately 10% of the estimated differences between  
397 cord and adult overlapped cord blood mQTLs, suggesting a genetic influence on the  
398 DNAm variation. In myeloid cells it was much higher, up to 79% in monocytes,  
399 suggesting that most of the differences between cord and adult cell types were actually  
400 genetic effects. This implies much less DNAm change in monocytes with age compared  
401 to other cell types, which is also consistent with previous reports.<sup>34</sup> Combined with the  
402 finding that monocytes, uniquely of all cell types, do not have many probes that are  
403 more methylated compared to the other cell types, monocytes seem to be quite different  
404 from other cell types in terms of their changes in DNAm with age. This may partly  
405 explain why, even after modifying the cord blood prediction, monocytes remain one of  
406 the most difficult cell types to predict, with the worst correlation coefficient of any cell  
407 type in the GenR data and the second worst in our validation data.

408 The second major difference between cord and adult blood that might impact  
409 deconvolution is the presence of nRBCs. Due to their abundance and unusual DNAm  
410 patterns, the presence of nRBCs influences DNAm pattern in cord blood, but to date  
411 their impact on estimation of cell type proportions has been poorly understood.<sup>25,35</sup> We  
412 showed that omitting nRBCs from the predictions reduced accuracy of predicting the  
413 other cell types. This analysis documented how heavily the constrained projection  
414 framework depends on a reference of each major cell type in the mixture. Eliminating  
415 one cell type will reduce prediction performance, though it is not always clear which cell  
416 type will be allocated to make up for one that is missing, and nRBCs may be particularly

417 prone to this due to their unusual DNAm pattern.<sup>18</sup> In addition, we note that while the  
418 predicted nRBC proportions were well correlated with the measured proportions, these  
419 were all scaled proportionally higher. One possible explanation is that the amount of  
420 nRBC DNA in a sample is not all contained within nRBCs and thus not reflected in cell  
421 counts. As these samples were derived from term births, red blood cells are in the  
422 process of extruding their nuclei, potentially leaving acellular DNA in the extracellular  
423 material which would then be collected along with the nuclear DNA from intact cells<sup>36</sup>.  
424 Such a process could explain the difference observed, as the deconvolution method is  
425 predicting the proportion of nRBC DNA, not cells. Given the high correlation, we are  
426 confident that the predictions were accurate for use as corrections, although using the  
427 magnitudes of predicted nRBC counts as an outcome should be done with caution. Of  
428 additional interest, although nRBCs are common in cord blood, they are not unheard of  
429 in adults, with substantial amounts having been reported in anemias, some leukemias,  
430 and some cardiac conditions.<sup>37</sup> In those cases, prediction of cell type composition by  
431 DNAm using adult references may demonstrate reduced accuracy, as shown in our  
432 experiment removing nRBCs in cord blood.

433 Putting all of our findings into a bigger perspective, we believe that reference-based  
434 prediction techniques are currently the best option for dealing with inter-individual  
435 differences in cell type proportions where cell counts are not available. In this case, our  
436 findings have shown that biological differences are associated with prediction accuracy,  
437 but this approach is not without limitations. First, our reference dataset is based on cell  
438 purification using FACS. This technology discriminates based on cell surface markers  
439 and does not distinguish between subpopulations within a particular cell type, which  
440 may also differ across development.<sup>9</sup> Second, cell counts for our validation data were  
441 quantified using a combination of flow cytometry and the complete blood count. This  
442 combination of methods runs the risk of compounding errors from the two methods and  
443 thus decreasing accuracy. However, given that we were able to show high accuracy of  
444 prediction on samples from two independent data sets, we believe that these counts  
445 were sufficiently accurate for correction in EWAS studies. Finally, the adult and cord  
446 data came from different data sets and different individuals, which means that both  
447 genetic differences and batch effects might inflate our estimate of age-specific

448 differences. To account for genetic differences, we assessed mQTL enrichment of our  
449 age-specific findings as described. Batch effects are more difficult, as they are  
450 confounded by age, and therefore not possible to specifically remove. However, since  
451 there is no expectation that batch effects would be cell-type specific, the comparisons  
452 between cell types should be equally affected by batch effects, and thus not bias the  
453 interpretation of the findings.

454

## 455 **Conclusions**

456 The exciting potential of epigenetic profiling of cord blood as a marker of *in utero*  
457 environmental exposure should be balanced by an understanding of the unique  
458 properties of that tissue. Based on our results, it is clear that leukocyte of different  
459 lineages mature differently *in utero* and after birth resulting in different DNAm between  
460 cord and adult cell types. These appeared to be primarily driven by lymphocytes, which  
461 have very similar DNAm profiles in cord blood compared to adults, mirroring their  
462 acquisition of immunological memory postnatally upon antigen exposure. These findings  
463 suggest an important functional role of DNAm in immune cell maturation during  
464 development, and indicate why DNAm-based tools that are generated in adults should  
465 be applied to other ages like cord blood with care.

466

## 467 **Methods**

### 468 *Sample collection*

469 Sorted and validation cord blood samples collected at UBC were collected from term  
470 elective caesarian deliveries at BC Women's Hospital. All mothers gave written  
471 informed consent, and protocols were approved by University of British Columbia  
472 Children's & Women's Research Ethics Board (certificate numbers H07-02681 and  
473 H04-70488).

### 474 *Purification of cord blood reference panel*

475 Cord blood cell types were purified as previously published.<sup>25</sup> Briefly, we applied seven  
476 whole cord blood samples to Lymphoprep (StemCell Technologies Inc., BC, Canada)

477 density gradient to separate granulocytes from mononuclear cells. Granulocytes were  
478 further separated from non-nucleated red blood cells by density gradient. The  
479 mononuclear fraction (which include nRBCs) was separated into constituent cell types  
480 using a stringent flow cytometry gating strategy, as described previously<sup>25</sup> on a  
481 FACSAriaIII (Becton Dickinson), generating purified populations of monocytes (CD3-,  
482 CD19-, CD235-, CD14+), CD4 T cells (CD14-, CD19-, CD235-, CD3+, CD4+), CD8 T  
483 cells (CD14-, CD19-, CD235-, CD3+, CD8+), NK cells (CD3-, CD19-, CD235-, CD14-,  
484 CD56+), B cells (CD3-, CD14-, CD235-, CD19+), and nucleated red blood cells (CD3-,  
485 CD14-, CD19-, CD235+, CD71+).

#### 486 *Quantification of cell type proportions in whole cord blood validation samples*

487 In addition to the sorted cord blood cell types, we collected twenty-four cord blood  
488 samples for validation. A small aliquot of each sample was sent to the BC Children's  
489 Hospital hematology lab for complete blood count with differential (CBC). A second  
490 aliquot was prepared as the reference samples above, with the same markers and  
491 antibodies, after lysis of red blood cells using BD FACS Lysing Solution (BD  
492 Bioscience). Final cell counts for nRBCs, granulocytes, monocytes and lymphocyte  
493 subsets were determined combining the CBC and flow cytometry data. CBC provided  
494 nRBC, monocyte, and granulocyte cells counts, as well as total lymphocytes. We then  
495 scaled these counts to total 1, and calculated lymphocyte subsets (relative proportions  
496 of B, NK, CD4T, and CD8T cells) by multiplying the total lymphocyte proportion by the  
497 relative proportions of lymphocyte subtypes measured by flow cytometry.

#### 498 *Generation of DNAm data*

499 DNA from sorted reference and whole validation cord blood samples was isolated using  
500 a Qiagen DNAeasy DNA isolation kit (Qiagen, USA). 750ng of isolated DNA was  
501 subjected to bisulfite conversion using the Zymo EZDNA bisulfite conversion kit (Zymo  
502 Research, USA), then applied to Illumina 450k microarrays per manufacturer's  
503 instructions. Raw data was imported into Illumina Genome Studio (Illumina, USA) for  
504 background subtraction and colour correction, then exported into R statistical software  
505 for analysis. Reference and validation data were processed and applied to the arrays in  
506 separate batches to simulate typical applications.

507 DNAm preprocessing included removing probes for high detection p-value ( $> 0.01$ ), low  
508 bead coverage ( $< 3$ ), sex chromosomes, cross hybridizing probes, and SNP probes.  
509 Next, we applied Noob to correct for background and BMIQ for probe type  
510 normalization.<sup>38,39</sup> Finally, we applied batch correction using ComBat, accounting for  
511 chip variability while explicitly protecting cell type.<sup>40,41</sup> The same protocol was used to  
512 normalize the FACS-sorted cord blood data from our study and another study along with  
513 the adult sorted data.<sup>3,20,25</sup> Validation data from Generation R data was generated as  
514 previously described.<sup>20,30,42</sup> For this study, we obtained it as IDAT files and normalized it  
515 using the same steps described above.

#### 516 *Comparison of cord and adult samples*

517 The dendrogram was generated using complete linkage of a Euclidean distance matrix  
518 of samples based on methylation beta values including all three of these FACS-sorted  
519 cell type data sets, with samples coloured by cell type, age, and myeloid vs lymphoid  
520 lineage. Silhouette analysis used the same distance matrix, clustered by cell type. We  
521 performed PCA on the same data set using the prcomp function in R. For the number of  
522 variable sites, we used only the adult data and our sorted data with similar N, counted  
523 the number of sites with SD  $> 0.05$  in beta value in each cell type by each age. To  
524 assess pairwise differences between cell types within adult and cord blood, we also  
525 used only our sorted cord blood data set with the adult data, and performed a two-group  
526 t-test on methylation m-values to determine the number of differentially methylated  
527 probes between each pair, using a nominal p value of  $1 \times 10^{-7}$ . As DNAm beta values are  
528 heteroscedastic, M values are a log transformation of beta values that avoids the typical  
529 statistical problems with heteroscedasticity.

530 We calculated the number of sites which discriminated between cell types and were  
531 higher- or lower- methylated in that cell type compared to others by first ranking all sites  
532 by p value calculated from a two sided t-test comparing that cell type to all other cell  
533 types. Next, we took the top 50 sites that had a mean DNAm value higher in that cell  
534 type than others, and the top 50 with a lower mean DNAm value, and plotted the  
535 magnitude of mean DNAm difference between that cell type and the other cell types.

#### 536 *Epigenome-wide association study comparing cord to adult white blood cells*

537 EWAS analysis was performed on the adult and our sorted cord blood data sets.<sup>3,25</sup> We  
538 applied the R package limma with a categorical variable of cord vs adult and no other  
539 covariates to normalized data, using a p value cutoff of  $1 \times 10^{-7}$  and a mean absolute  
540 beta value difference of 0.1 to define a significant CpGs.

#### 541 *Cell type prediction*

542 For prediction of cell type proportions in cord blood, we applied the constrained  
543 projection quadratic programming (CP/QP) algorithm developed by Houseman et al.,  
544 Houseman:2012km as implemented in the minfi package without modification, and  
545 using either adult or cord reference libraries.<sup>3,5,18,25,29</sup> We then quantified the sensitivity  
546 of our procedure by comparing estimated proportions on the same set of samples  
547 depending on whether or not a nRBC profile was available, and after optimized  
548 preprocessing and feature selection. Finally, we performed deconvolution again using  
549 the cord blood references and defining the sites used in deconvolution as the sites with  
550 the top f statistic regardless of direction of change on both our validation and the  
551 Generation R data. Accuracy of deconvolution estimates with cell counts was measured  
552 with Spearman's Rho in all cases.

553

#### 554 **Declarations**

##### 555 *Ethics approval and consent to participate*

556 The study protocol was approved by the Medical Ethical Committee of the Erasmus  
557 Medical Centre, Rotterdam. Written informed consent was obtained for all participants.

558

##### 559 *Consent for publication*

560 Not applicable

561

##### 562 *Availability of data and material*

563 Reference cord and adult data and used in this study is available on GEO (GSE35069,  
564 GSE82084). Validation samples that were internally generated are also available  
565 (GEO# TBD), and Generation R data may be available upon request from the study  
566 coordinators. Full code for figures is available on GitHub

567 ([https://github.com/megjones/Rotterdam\\_code/blob/master/CordvsAdult\\_figures](https://github.com/megjones/Rotterdam_code/blob/master/CordvsAdult_figures)), and  
568 modified code for cord deconvolution is available

569 [https://github.com/megjones/Rotterdam\\_code/blob/master/Initial\\_deconvolution\\_edited.](https://github.com/megjones/Rotterdam_code/blob/master/Initial_deconvolution_edited.R)  
570 R.

571

572 *Competing interests*

573 The authors declare that they have no competing interests.

574

575 *Funding*

576 UBC: 450k data was funded by the Sunny Hill BC Leadership Chair in Child  
577 Development to MSK.

578 GenR: 450k data was funded by a grant from the Netherlands Genomics Initiative  
579 (NGI)/Netherlands Organisation for Scientific Research (NWO) Netherlands Consortium  
580 for Healthy Aging (NCHA; project nr. 050-060-810), by funds from the Genetic  
581 Laboratory of the Department of Internal Medicine, Erasmus MC, and by a grant from  
582 the National Institute of Child and Human Development (R01HD068437). JFF has  
583 received funding from the European Union's Horizon 2020 research and innovation  
584 programme under grant agreement No 633595 (DynaHEALTH). This project received  
585 funding from the European Union's Horizon 2020 research and innovation programme  
586 (733206, LIFECYCLE). LD received funding from the co-funded programme ERA-Net  
587 on Biomarkers for Nutrition and Health (ERA HDHL) (ALPHABET project, Horizon 2020  
588 (grant agreement no 696295; 2017), ZonMW The Netherlands (no 529051014; 2017)).  
589 National Health and Medical Research Council (NHMRC) Senior Research Fellowship  
590 (GNT1117687) to MvZ.

591

592 *Authors' contributions*

593 MJJ conceived the study, performed data analysis, and drafted the manuscript. LD  
594 performed data analysis and helped draft the manuscript. HRR collected reference and  
595 validation cord blood samples. OdG performed FACS to generate reference samples.  
596 JLM and AMM ran the 450k arrays for the de Goede references and internal validation  
597 samples. KG, RN, and RL advised on study design and data analysis. LD, MCvZ, and  
598 HAM generated FACS data for the GenR cohort. WPR, DCK, JFF, PLM, and SM helped  
599 conceive the study, advised on study design, and helped edit the manuscript. MSK  
600 helped conceive the study, oversaw the study, and helped edit the manuscript. All  
601 authors read and approved the final manuscript.

602

603 *Acknowledgements*

604 The general design of the Generation R Study is made possible by financial support  
605 from the Erasmus Medical Center, Rotterdam, the Erasmus University Rotterdam, the  
606 Netherlands Organization for Health Research and Development and the Ministry of  
607 Health, Welfare and Sport. The Generation R Study is conducted by the Erasmus  
608 Medical Center in close collaboration with the School of Law and Faculty of Social  
609 Sciences of the Erasmus University Rotterdam, the Municipal Health Service Rotterdam  
610 area, Rotterdam, the Rotterdam Homecare Foundation, Rotterdam and the Stichting  
611 Trombosedienst & Artsenlaboratorium Rijnmond (STAR-MDC), Rotterdam. We  
612 gratefully acknowledge the contribution of children and parents, general practitioners,  
613 hospitals, midwives and pharmacies in Rotterdam.

614 The generation and management of the Illumina 450K methylation array data (EWAS  
615 data) for the Generation R Study was executed by the Human Genotyping Facility of the

616 Genetic Laboratory of the Department of Internal Medicine, Erasmus MC, the  
617 Netherlands. We thank Mr. Michael Verbiest, Ms. Mila Jhamai, Ms. Sarah Higgins, Mr.  
618 Marijn Verkerk and Dr. Lisette Stolk for their help in creating the EWAS database.

619

620

## 621 **References**

- 622 1. Smith, Z. D. & Meissner, A. DNA methylation: roles in mammalian development.  
623 *Nat Rev Genet* **14**, 204–220 (2013).
- 624 2. Jones, M. J., Goodman, S. J. & Kobor, M. S. DNA methylation and healthy human  
625 aging. *Aging Cell* **14**, 924–932 (2015).
- 626 3. Reinius, L. E. *et al.* Differential DNA methylation in purified human blood cells:  
627 implications for cell lineage and studies on disease susceptibility. *PLoS ONE* **7**,  
628 e41361 (2012).
- 629 4. Ziller, M. J. *et al.* Charting a dynamic DNA methylation landscape of the human  
630 genome. *Nature* **500**, 477–481 (2013).
- 631 5. Jaffe, A. E. & Irizarry, R. A. Accounting for cellular heterogeneity is critical in  
632 epigenome-wide association studies. *Genome Biol* **15**, R31 (2014).
- 633 6. Farré, P. *et al.* Concordant and discordant DNA methylation signatures of aging in  
634 human blood and brain. *Epigenetics Chromatin* **8**, 19 (2015).
- 635 7. Joubert, B. R. *et al.* DNA Methylation in Newborns and Maternal Smoking in  
636 Pregnancy: Genome-wide Consortium Meta-analysis. *Am J Hum Genet* **98**, 680–  
637 696 (2016).
- 638 8. Gaunt, T. R. *et al.* Systematic identification of genetic influences on methylation  
639 across the human life course. *Genome Biol* **17**, 61 (2016).
- 640 9. Kan, B., Razzaghiyan, H. R. & Lavoie, P. M. An Immunological Perspective on  
641 Neonatal Sepsis. *Trends in Molecular Medicine* **22**, 290–302 (2016).
- 642 10. van den Heuvel, D. *et al.* Effects of nongenetic factors on immune cell dynamics  
643 in early childhood: The Generation R Study. *Journal of Allergy and Clinical*  
644 *Immunology* **139**, 1923–1934.e17 (2017).
- 645 11. Holt, P. G. & Jones, C. A. The development of the immune system during  
646 pregnancy and early life. *Allergy* **55**, 688–697 (2000).
- 647 12. Quinello, C. *et al.* Phenotypic differences in leucocyte populations among healthy  
648 preterm and full-term newborns. *Scand. J. Immunol.* **80**, 57–70 (2014).
- 649 13. Kollmann, T. R., Levy, O., Montgomery, R. R. & Goriely, S. Innate immune  
650 function by Toll-like receptors: distinct responses in newborns and the elderly.  
651 *Immunity* **37**, 771–783 (2012).
- 652 14. Netea, M. G. Training innate immunity: the changing concept of immunological  
653 memory in innate host defence. *Eur. J. Clin. Invest.* **43**, 881–884 (2013).
- 654 15. Shen-Orr, S. S. *et al.* Cell type-specific gene expression differences in complex  
655 tissues. *Nat Methods* **7**, 287–289 (2010).
- 656 16. Lam, L. L. *et al.* Factors underlying variable DNA methylation in a human  
657 community cohort. *Proc Natl Acad Sci USA* **109 Suppl 2**, 17253–17260 (2012).
- 658 17. Liu, Y., Balaraman, Y., Wang, G., Nephew, K. P. & Zhou, F. C. Alcohol exposure  
659 alters DNA methylation profiles in mouse embryos at early neurulation.  
660 *epigenetics* **4**, 500–511 (2009).



- 661 18. Houseman, E. A. *et al.* DNA methylation arrays as surrogate measures of cell  
662 mixture distribution. *BMC Bioinformatics* **13**, 86 (2012).
- 663 19. Koestler, D. C. *et al.* Blood-based profiles of DNA methylation predict the  
664 underlying distribution of cell types: a validation analysis. *Epigenetics : official*  
665 *journal of the DNA Methylation Society* **8**, 816–826 (2013).
- 666 20. Gervin, K. *et al.* Cell type specific DNA methylation in cord blood: a 450K-  
667 reference data set and cell count-based validation of estimated cell type  
668 composition. *Epigenetics : official journal of the DNA Methylation Society* **0**  
669 (2016). doi:10.1080/15592294.2016.1214782
- 670 21. Yousefi, P. *et al.* Estimation of blood cellular heterogeneity in newborns and  
671 children for epigenome-wide association studies. *Environ. Mol. Mutagen.* **56**, 751–  
672 758 (2015).
- 673 22. Bakulski, K. M. *et al.* DNA methylation of cord blood cell types: Applications for  
674 mixed cell birth studies. *Epigenetics : official journal of the DNA Methylation*  
675 *Society* 1–9 (2016). doi:10.1080/15592294.2016.1161875
- 676 23. Koch, C. M. *et al.* Specific age-associated DNA methylation changes in human  
677 dermal fibroblasts. *PLoS ONE* **6**, e16679 (2011).
- 678 24. Horvath, S. DNA methylation age of human tissues and cell types. *Genome Biol*  
679 **14**, R115 (2013).
- 680 25. de Goede, O. M. *et al.* Nucleated red blood cells impact DNA methylation and  
681 expression analyses of cord blood hematopoietic cells. *Clin Epigenetics* **7**, 95  
682 (2015).
- 683 26. Lin, D. *et al.* Characterization of cross-tissue genetic-epigenetic effects and their  
684 patterns in schizophrenia. *Genome Med* **10**, 13 (2018).
- 685 27. Smith, A. K. *et al.* Methylation quantitative trait loci (meQTLs) are consistently  
686 detected across ancestry, developmental stage, and tissue type. *BMC Genomics*  
687 **15**, 145 (2014).
- 688 28. Koestler, D. C. *et al.* Improving cell mixture deconvolution by identifying optimal  
689 DNA methylation libraries (IDOL). *BMC Bioinformatics* **17**, 120 (2016).
- 690 29. Aryee, M. J. *et al.* Minfi: a flexible and comprehensive Bioconductor package for  
691 the analysis of Infinium DNA methylation microarrays. *Bioinformatics* **30**, 1363–  
692 1369 (2014).
- 693 30. Kruithof, C. J. *et al.* The Generation R Study: Biobank update 2015. *Eur J*  
694 *Epidemiol* **29**, 911–927 (2014).
- 695 31. de Jong, E., Strunk, T., Burgner, D., Lavoie, P. M. & Currie, A. The phenotype  
696 and function of preterm infant monocytes: implications for susceptibility to  
697 infection. *Journal of Leukocyte Biology* **102**, 645–656 (2017).
- 698 32. Sharma, A. A. *et al.* Hierarchical Maturation of Innate Immune Defences in Very  
699 Preterm Neonates. *NEO* **106**, 1–9 (2014).
- 700 33. Comans-Bitter, W. M. *et al.* Immunophenotyping of blood lymphocytes in  
701 childhood. Reference values for lymphocyte subpopulations. *J. Pediatr.* **130**, 388–  
702 393 (1997).
- 703 34. Ecker, S. *et al.* Genome-wide analysis of differential transcriptional and epigenetic  
704 variability across human immune cell types. *Genome Biol* **18**, 18 (2017).

- 705 35. de Goede, O. M., Lavoie, P. M. & Robinson, W. P. Characterizing the  
706 hypomethylated DNA methylation profile of nucleated red blood cells from cord  
707 blood. *Epigenomics* **8**, 1481–1494 (2016).
- 708 36. Hebiguchi, M. *et al.* Dynamics of human erythroblast enucleation. *Int J Hematol*  
709 **88**, 498–507 (2008).
- 710 37. Schwartz, S. O. & Stansbury, F. Significance of nucleated red blood cells in  
711 peripheral blood; analysis of 1,496 cases. *J Am Med Assoc* **154**, 1339–1340  
712 (1954).
- 713 38. Triche, T. J., Weisenberger, D. J., Van Den Berg, D., Laird, P. W. & Siegmund, K.  
714 D. Low-level processing of Illumina Infinium DNA Methylation BeadArrays.  
715 *Nucleic Acids Research* **41**, e90–e90 (2013).
- 716 39. Teschendorff, A. E. *et al.* A beta-mixture quantile normalization method for  
717 correcting probe design bias in Illumina Infinium 450 k DNA methylation data.  
718 *Bioinformatics* **29**, 189–196 (2013).
- 719 40. Johnson, W. E., Li, C. & Rabinovic, A. Adjusting batch effects in microarray  
720 expression data using empirical Bayes methods. *Biostatistics* **8**, 118–127 (2007).
- 721 41. Chen, C. *et al.* Removing batch effects in analysis of expression microarray data:  
722 an evaluation of six batch adjustment methods. *PLoS ONE* **6**, e17238 (2011).
- 723 42. Kooijman, M. N. *et al.* The Generation R Study: design and cohort update 2017.  
724 *Eur J Epidemiol* **31**, 1243–1264 (2017).

725

726

727 **Supplementary figures and tables**

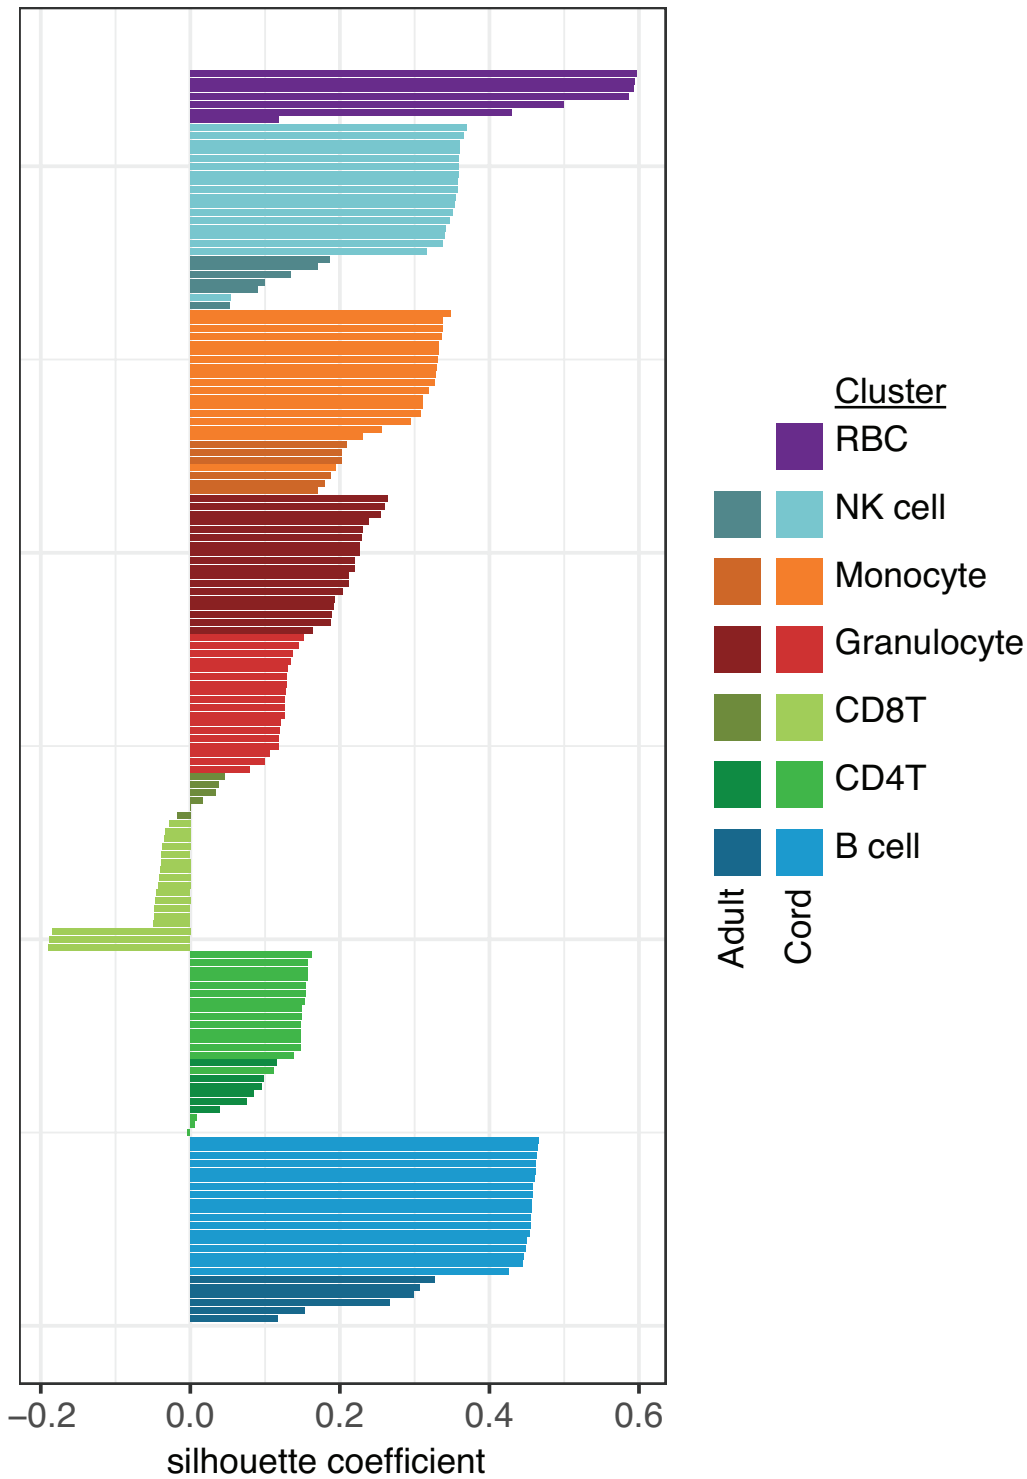

728

729

730

731

732

733

**Figure S1: DNA methylation patterns of leukocyte cell types cluster together.** Silhouette plot based on DNAm data show 7 clusters. Cord and adult samples are indicated in the same colour, but different shades (dark for adult and light for cord blood data).

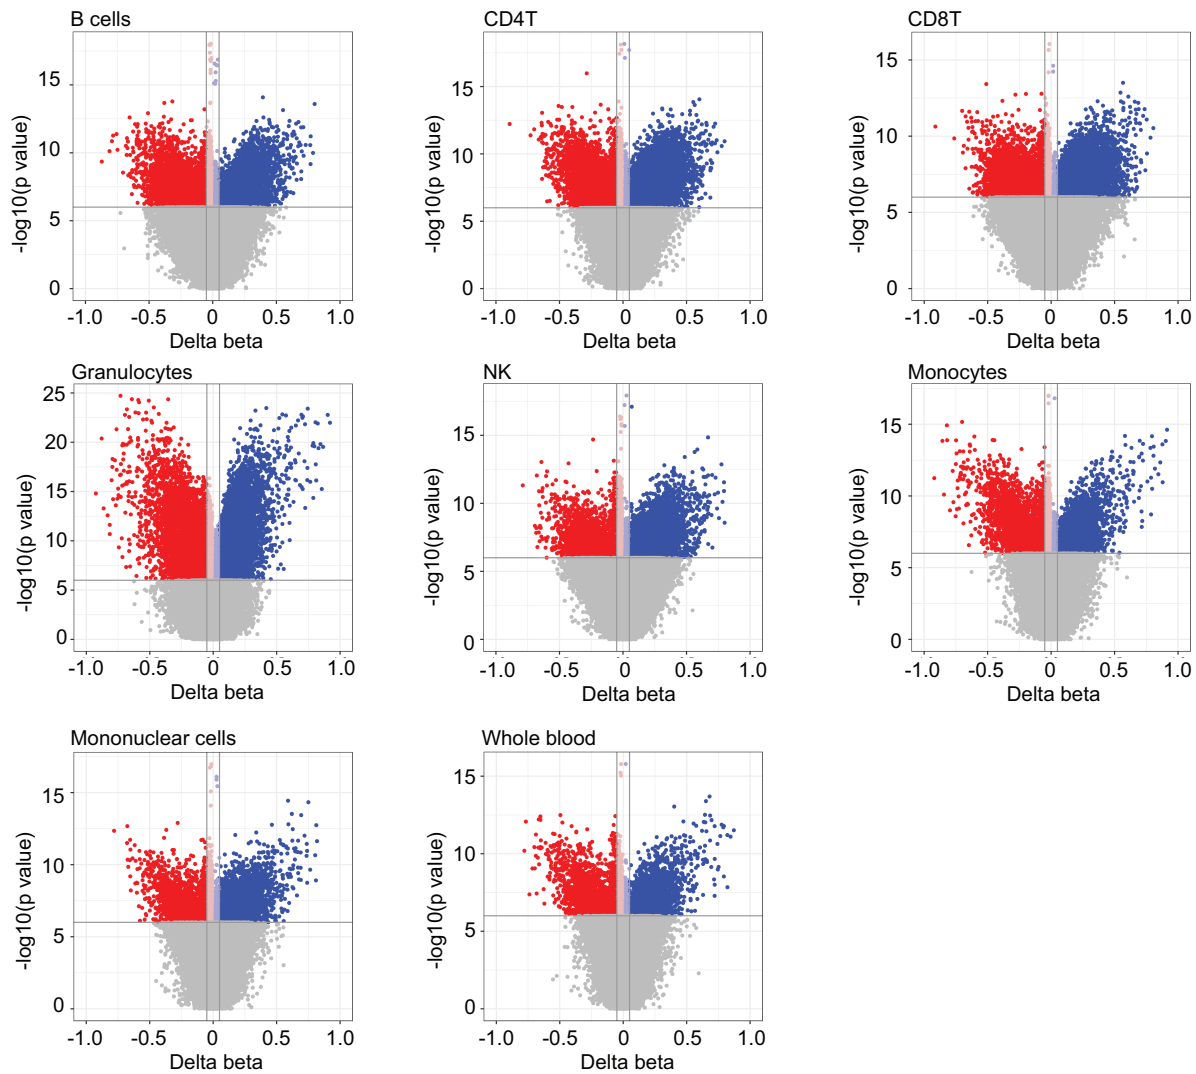

734

735

736

737

738

**Figure S2: EWAS analysis shows large differences between cord and adult in all cell types.** Volcano plots for each component cell type and two cell mixtures (whole blood and mononuclear cells). Sites in grey did not meet the  $1 \times 10^{-7}$  p value cutoff. Sites in light red and light blue did not meet the absolute beta value difference of 0.1.

### A. Adult references, cord samples

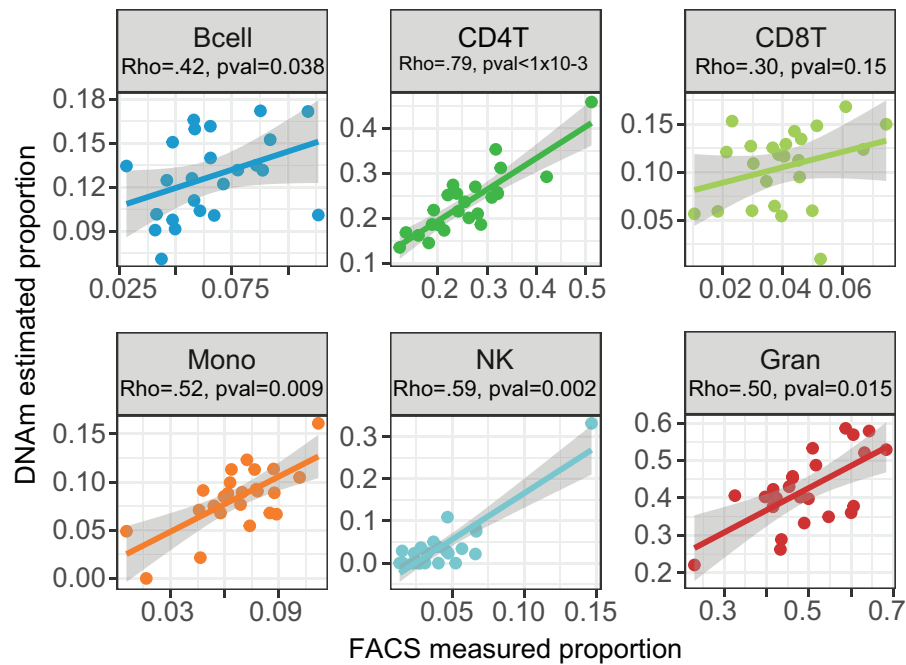

### B. Cord references, cord samples

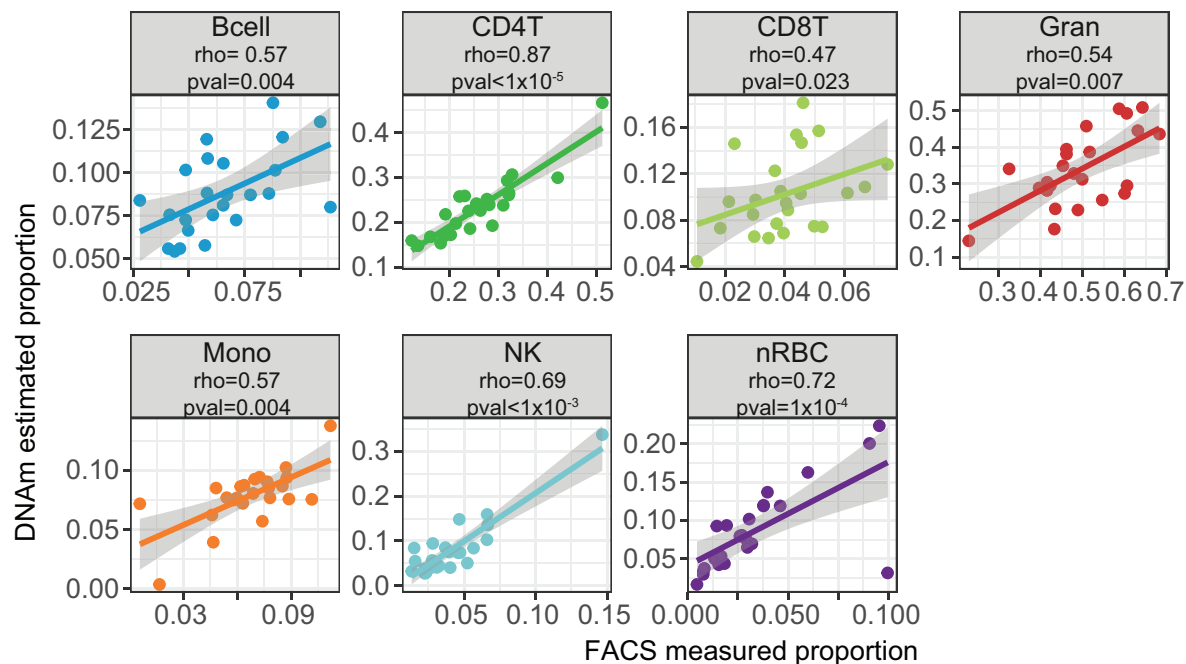

739

740

741

742

743

744

**Figure S3: Using adult references in deconvolution of cord blood results in poor prediction, and using cord references improves predictions, but some cell types remain poorly predicted.** In 24 cord blood cell types, flow cytometry-based cell counts (x axis) are plotted against DNAm deconvolution-based estimates (y axis), using either adult **(A)** or cord **(B)** blood references.

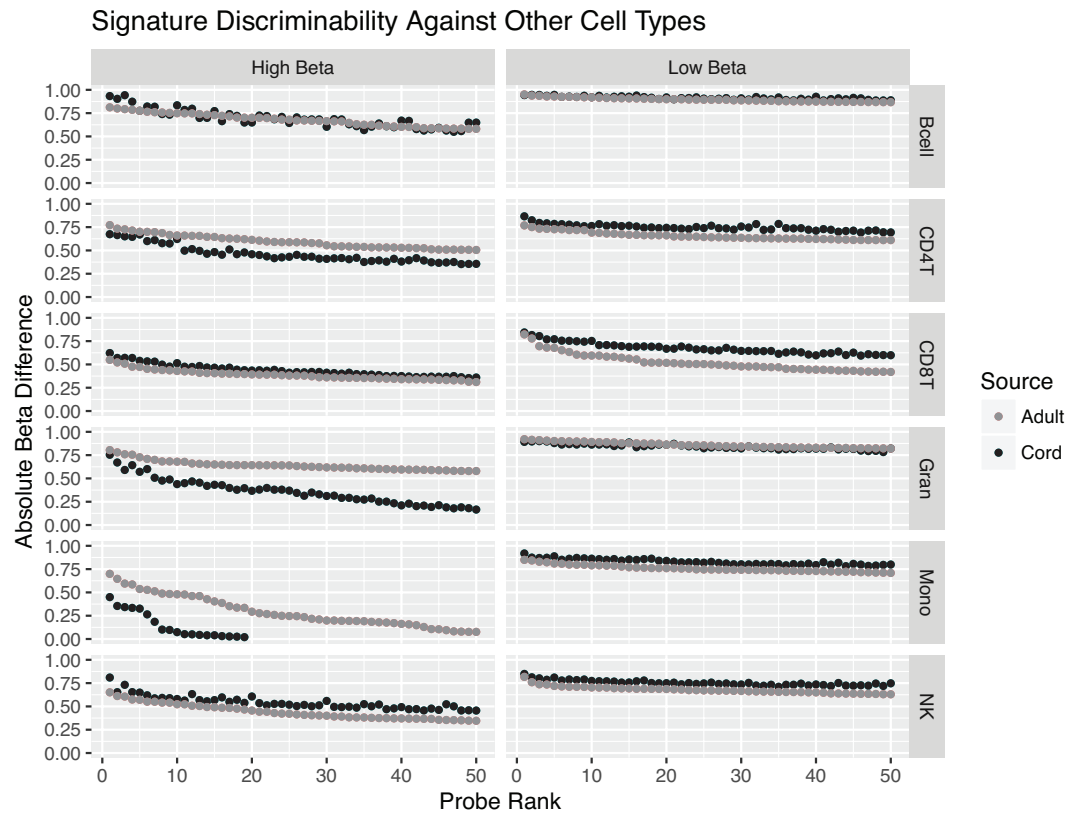

745

746 **Figure S4: Cord blood had fewer cell type-distinguishing CpGs that were more**  
747 **more methylated in a particular cell type than other cell types.** Plots show the 50 best  
748 ranked distinguishing probes by p value (x axis) versus the average DNAm difference  
749 between a particular cell type and other cell types (y axis), and whether they are more  
750 (top) or less (bottom) methylated in that cell type than others. For each cell type, the  
751 sites that are more methylated drop to 0 in actual DNAm difference before reaching 50,  
752 meaning that some of the probes that would have been chosen to use in deconvolution  
753 are actually not differentially methylated in that cell type at all.

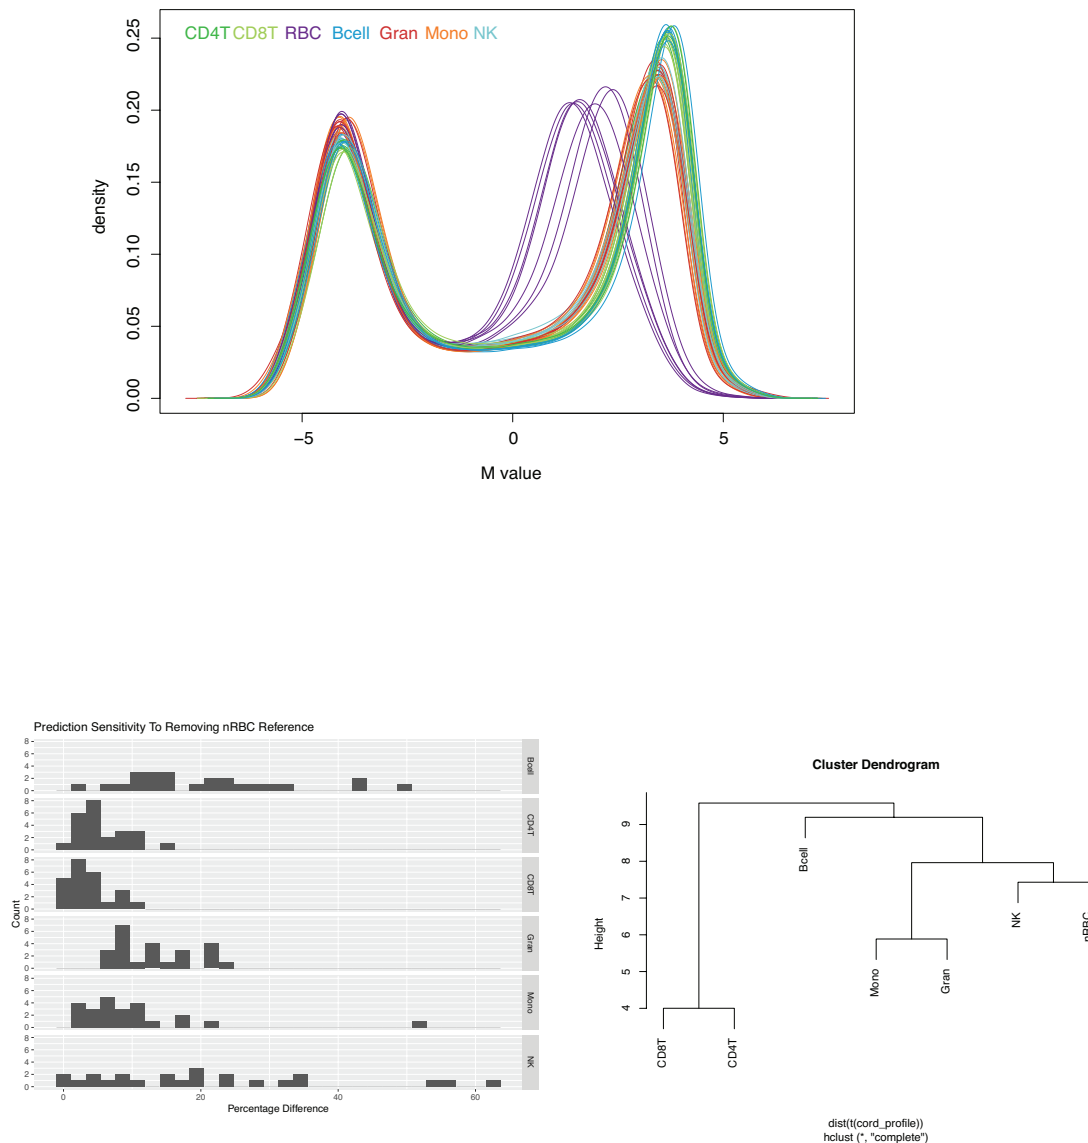

754

755

**Figure S5: Including nRBCs in deconvolution of cord blood is important for accurate predictions of all cell types.** **A)** DNAm profiles for cord white blood cell types. N=7 for each cell type except CD8 T cells, where N=6. **B)** Histogram showing the difference between predicted and actual cell counts for each cell type if nRBCs were not included in the prediction. **C)** Dendrograms showing relationships in DNAm pattern at sites used in deconvolution across the 7 cord blood cell types. NK cells are the most similar to nRBCs at these sites, explaining why this cell type is the most impacted by not including nRBCs.

763

764

765 **Table S1:** Numbers of variable CpGs, defined as SD>0.05 in cord and adult white blood  
766 cell types

| <b>Cell Type</b>         | <b>Cord</b> | <b>Adult</b> |
|--------------------------|-------------|--------------|
| <b>CD4 T</b>             | 22,755      | 34,329       |
| <b>CD8 T</b>             | 19,848      | 85,170       |
| <b>B</b>                 | 21,100      | 78,277       |
| <b>NK</b>                | 95,560      | 33,380       |
| <b>Gran</b>              | 23,304      | 41,801       |
| <b>Mono</b>              | 22,156      | 30,438       |
| <b>nRBC</b>              | 77,888      | N/A          |
| <b>Mononuclear cells</b> | 22,877      | 46,381       |
| <b>Whole blood</b>       | 25,910      | 42,935       |

767

768 **Table S2:** Number of differentially methylated sites between cord and adult and how  
769 many of those are mQTLs

|                       | <b>N unique DM sites</b> | <b>N mQTLs</b> | <b>Percentage mQTLs</b> |
|-----------------------|--------------------------|----------------|-------------------------|
| <b>B</b>              | 6393                     | 387            | 6.05                    |
| <b>CD4 T</b>          | 7840                     | 636            | 8.11                    |
| <b>CD8 T</b>          | 4443                     | 377            | 8.48                    |
| <b>G</b>              | 7235                     | 1355           | 18.72                   |
| <b>Mo</b>             | 339                      | 268            | 79.05                   |
| <b>NK</b>             | 3518                     | 344            | 9.78                    |
| <b>All cell types</b> | 588                      | 65             | 11.05                   |
| <b>Myeloid</b>        | 2062                     | 242            | 11.73                   |
| <b>Lymphoid</b>       | 397                      | 37             | 9.31                    |

770

771 **Table S3:** Pairwise differentially methylated cord vs adult probe overlaps

|              | <b>B</b>    | <b>CD4T</b> | <b>CD8T</b> | <b>G</b>    | <b>Mo</b>   | <b>NK</b>   |
|--------------|-------------|-------------|-------------|-------------|-------------|-------------|
| <b>B</b>     | <b>7378</b> |             |             |             |             |             |
| <b>CD4 T</b> | 2344        | <b>8825</b> |             |             |             |             |
| <b>CD8 T</b> | 2079        | 3071        | <b>5428</b> |             |             |             |
| <b>G</b>     | 2558        | 2595        | 1746        | <b>9885</b> |             |             |
| <b>Mo</b>    | 1472        | 1342        | 970         | 2650        | <b>2989</b> |             |
| <b>NK</b>    | 2202        | 2140        | 1987        | 2081        | 1166        | <b>4503</b> |

772

773
